# Supplementary figures and images for: Exome sequencing identifies de novo pathogenic variants in FBN1 and TRPS1 in a patient with a complex connective tissue phenotype
Source: PubMed Central journal article supplement — Cold Spring Harb Mol Case Stud. 2017 Jan;3(1):a001388. doi: 10.1101/mcs.a001388 (PMC5171698; doi:10.1101/mcs.a001388), 2017-01

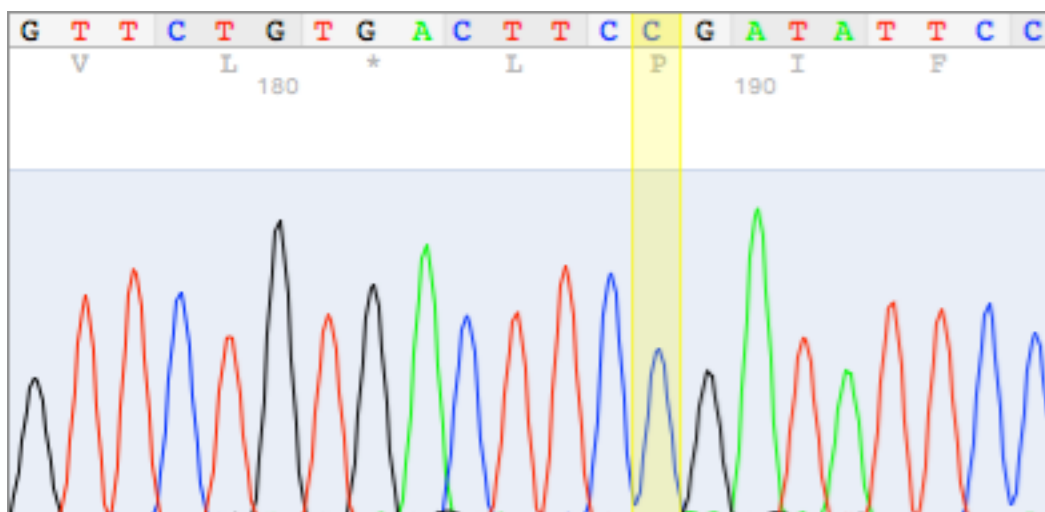

Supplement: supp_mcs.a001388_FigS1E.pdf [file supp_mcs.a001388_FigS1E.pdf]

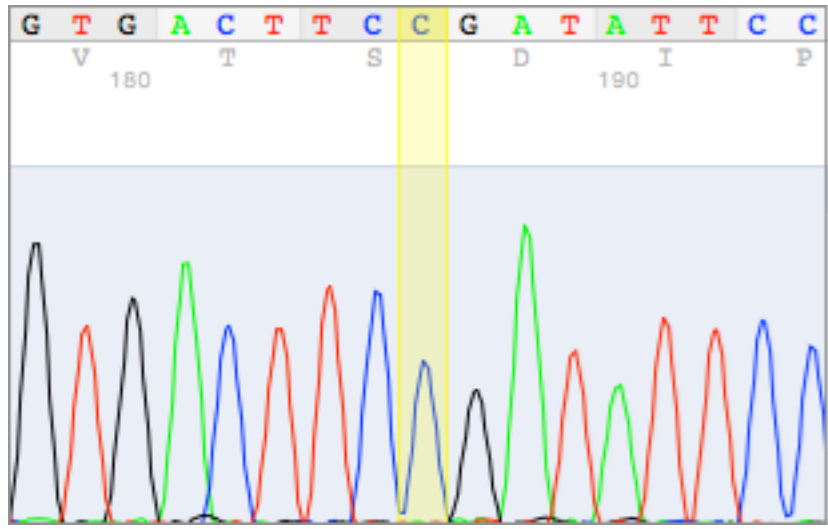

Supplement: supp_mcs.a001388_FigS1F.pdf [file supp_mcs.a001388_FigS1F.pdf]
